# Supplementary material for: Follow-up Investigation on the Causes and Complications of Gestational Diabetes Mellitus
Source: Research Square preprint supplement (doi:10.21203/rs.3.rs-858199/v1), 2021-09-28
Supplement: Supplementary file 1 [file 621240a54d3c0adf28c0a057.docx]

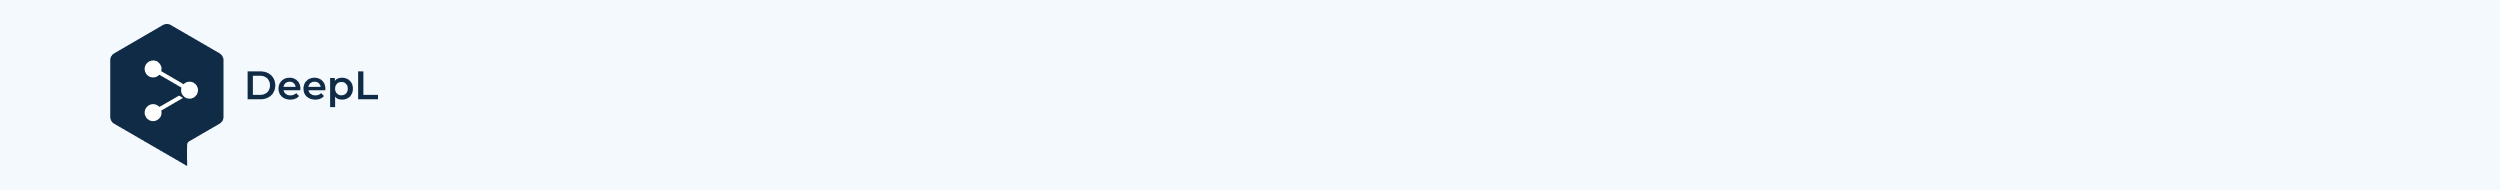


Subscribe to DeepL Pro to edit this document.
Visit [www.DeepL.com/pro](https://www.deepl.com/pro?cta=edit-document) for more information.

| Basic Information | | | | Diabetes Causes and Status | | | | Health Status | Treatment | | | |  | Production method |  |  |  |  |  |  |
| --- | --- | --- | --- | --- | --- | --- | --- | --- | --- | --- | --- | --- | --- | --- | --- | --- | --- | --- | --- | --- |
| Name | Age | Height | Body weight kg | Admission blood glucose mmol/l | Types of regular diet | Approximate daily caloric intake | Diabetes detection time to childbirth | Complications and other diseases | Diet modification | Physical exercise | Medication | Blood glucose mmol/l at childbirth | Gestational week of delivery | Cesarean or normal delivery | Gender | Body weight | Infant Health | Surgical complications | Length of hospitalization | Postnatal recovery |
| Ren Yanan | 24 | 164 | 72.4 | Likes to eat sweet food and drink Fasting blood sugar: 5.9mmol/L, 1 hour postprandial blood sugar: 8.4mmol/L, 2 hours postprandial blood sugar: 8.0mmol/L. | Steamed buns, rice, vegetables, fruits, sweets, eggs | 2600 | 5 Months | None | Yes (diabetic diet with less pasta, less sugar and less fat) | Yes, climbing stairs on foot | None | Fasting 5.3 Postprandial 8.4 | 38+6 | Cesarean section | Male | 4000g | Discharged from the hospital after being referred to pediatrics for treatment of subpharyngeal syndrome | 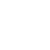   | The knife hard knot 3 * 3cm infrared physical therapy after the improvement | | --- | | 6 days | Postpartum 42 OGTT blood glucose normal, no abnormal signs in the newborn |
| Zhao Shuang | 23 | 166 | 94 | Obese before pregnancy, less exercise after pregnancy Fasting glucose 6.1mmol/L; 1 hour postprandial glucose 13.6mmol/L; 2 hour postprandial glucose 10.7mmol/L. | Steamed buns, rice, vegetables, fruits, seafood, eggs | 3500 | 13 weeks | Hyperlipidemia Vaginitis, premature rupture of membranes | Yes (diabetic diet with less pasta, less sugar and low-fat portioned meals) | Yes, climbing stairs biking walking | Menthol insulin injection 20u 18u 18u before three meals Dettol insulin injection 28u ih 10pm | 4.7 (fasting) | 39+2 | easy childbirth | Male | 4000g | Observation of hypoglycemia referred to pediatric treatment | None, good healing of the incision | 3 days | OGTT glucose normal at 42 postpartum review, newborn hospitalized for bronchopneumonia at 24 days |
| Liu Ying | 22 | 168 | 100 | Pre-pregnancy obesity, post-pregnancy preference for sweets and fruits Fasting blood sugar 6.0mmol/l; 2 hours post-meal blood sugar 9.7mmol/l. | Steamed buns, meat, vegetables, fruits, sweets | 3400 | 3 Months | Hyperlipidemia, hypothyroidism | Yes (diabetic diet with less pasta, less sugar and less fat) | Yes, climbing stairs on foot | Dettol insulin injection 12u ih 10pm | 7.4 (random) | 38+6 | easy childbirth | Female | 3100g | Observation of neonatal aspiration pneumonia transferred to pediatric department for treatment | None, good healing of the incision | 3 days | Postpartum OGTT glucose normal at 42 postpartum review: no abnormal signs in the newborn |
| Liu Xiuling | 38 | 160 | 75 | Less exercise after pregnancy 2020-9-13 fasting glucose 5.7mmol/L. 2020-9-13 1h postprandial glucose 8.2mmol/L. 2020-9-13 2h postprandial glucose 7.8mmol/L. | Steamed buns, rice, vegetables, fruits | 2700 | 3 Months | Hypertensive disorders during pregnancy | Yes (diabetic diet with less pasta and less sugar) | Yes, walking and climbing stairs double upper body exercise | Dettol insulin 10u ih 9pm | 4.3 (random) | 40+3 | Cesarean delivery | Male | 3800g | Observation of hypoglycemia referred to pediatric treatment | None, good healing of the incision | 5 days | OGTT glucose was normal at 42 postpartum and the newborn was hospitalized for observation at 3 months due to acute bronchitis |
| Meng Wenhui | 40 | 157 | 75 | Pre-pregnancy obesity, post-pregnancy preference for pasta such as snacks Fasting blood sugar 6.0mmol/L; 2 hours post-meal blood sugar 8.3mmol/L. | Steamed buns, noodles, green vegetables, fruits, snacks | 3000 | 1 month | Vaginitis, premature rupture of membranes | Yes (diabetic diet with less pasta and less sugar in divided meals) | Yes, walking | Menthol insulin injection 5u 5u 5u before three meals Dettol insulin injection 6u ih 10pm | 4.8 (random) | 38+1 | easy childbirth | Male | 4200g | Jaundice referred to pediatric treatment | None, good healing of the incision | 3 days | Postpartum 42 OGTT glucose was normal; no abnormal signs in the newborn |
| Meiying Liu | 39 | 162 | 97 | Obese before pregnancy, less exercise after pregnancy Fasting glucose: 6.7 mmol/L, 2 hours postprandial glucose: 11.3 mmol/L, glycated hemoglobin: 6.3%. | Steamed buns, rice, vegetables, fruits | 3600 | 5 Months | Intrauterine distress with excessive amniotic fluid | Yes (diabetic diet with less pasta and less sugar) | Yes, climbing stairs on foot | Menthol insulin injection 8u 8u 8u 8u before three meals Dettol insulin injection 10u ih 10pm | 4.7 (fasting) | 36+5 | Cesarean delivery | Female | 2800g | Jaundice and ductus arteriosus referred to pediatrics and discharged | The knife hard knot 4 * 3cm infrared physiotherapy herbal medicine external application after the improvement | 9 days | The glucose of the newborn was normal at 42 postpartum OGTT; the heart ultrasound did not show any significant abnormality at full term, and the newborn was hospitalized at 4 months for hairy branch infection. |
| Su Ningning | 31 | 160 | 83 | Prefer fruit, less exercise Fasting blood glucose: 5.7 mmol/l; 2020-08-13 1h postprandial blood glucose: 11.4 mmol/l; 2020-08-13 2h postprandial blood glucose: 10.3 mmol/l; 2020-08-13 glycated hemoglobin: 5.5%. | Steamed buns, rice, vegetables, fruits, dairy products | 3300 | 12 weeks | Hypertensive disorders during pregnancy | Yes (diabetic diet with less pasta and less sugar in divided meals) | Yes, walking and biking | Menthol insulin injection 4u 4u 4u 4u before three meals Dettol insulin injection 8u ih 10 pm Blood glucose monitoring | 4.7 (fasting) | 38+4 | Cesarean delivery | Male | 3700g | Good | None, good healing of the incision | 7 days | Postpartum 42 OGTT blood glucose normal, no abnormal signs in the newborn |
| Gu Zijing | 30 | 175 | 70 | Prefer to eat dessert, less exercise OGTT shows fasting blood glucose 6.8mmol/l, 1h blood glucose 13.3mmol/l, 2h blood glucose 10.3mmol/l Glycosylated hemoglobin: 6.2% | Steamed buns, noodles, vegetables, fruits, sweets | 2600 | 13 weeks | Excessive amniotic fluid | Yes (diabetic diet with less pasta and less sugar and more protein) | Yes, walking upper body movement | Menthol insulin 16u 16u 18u ih before each of the three meals, and digitonin 26u ih at bedtime. | 5.7 (fasting) | 38+6 | Cesarean delivery | Female | 3500g | Observation of hypoglycemia referred to pediatric treatment | None, good healing of the incision | 8 days | OGTT glucose normal at 42 postpartum; newborn hospitalized for sepsis on day 48 |
| Gao Mei | 30 | 155 | 62.5 | Pre-pregnancy obesity Blood glucose: FPG 4.9mmol/l, 1HPG 11.3mmol/l. | Steamed buns, rice, vegetables, fruits, soy products | 2700 | 15 weeks | None | Yes (diabetic diet with less pasta and less sugar) | Yes, walking | None | 6.4 (random) | 39+6 | easy childbirth | Male | 3350g | Good | None, good healing of the incision | 4 days | Postpartum 42 OGTT glucose was normal; no abnormal signs in the newborn |
| Zhao Shuyu | 22 | 167 | 63 | Fasting blood glucose: 5.2 mmol/L, 1 hour postprandial blood glucose: 12.4 mmol/L, 2 hours postprandial blood glucose: 10.8 mmol/L. | Steamed buns, rice, vegetables, fruits, sweets | 2400 | 3 Months | Vulvodynia | Yes (diabetic diet with less pasta and less sugar in meals with high protein) | Yes, walking | Menthol insulin injection 4u 4u before breakfast and lunch | (after meal) 10.8 | 37+4 | easy childbirth | Male | 3000g | Jaundice improves with oral medication | None, healing can be | 3 days | Postpartum 42 OGTT glucose was normal; no abnormal signs in the newborn |
| Zhang Yan | 34 | 158 | 70 | Pre-pregnancy obesity, post-pregnancy preference for pasta and fruit OGTT fasting glucose: 6.0mmol/L, 1 hour postprandial glucose: 13mmol/L, 2 hour postprandial glucose: 10.0mmol/L" | Steamed buns, desserts, rice, vegetables, fruits | 2800 | 16 weeks | Hypoamniotic fluid, intrauterine distress, hypothyroidism, thrombocytopenia causes to be investigated | Yes (diabetic diet with less pasta and less sugar in divided meals) | Yes, walking and stair climbing upper body exercise | Dietary insulin 8u at bedtime ih, Menthol insulin 6u 6u 6u before three meals ih | 5.5 (random) | 40+1 | Cesarean delivery | Female | 2950g | Jaundice improves with oral medication | None, healing can be | 6 days | Postpartum OGTT glucose was normal at 42 postpartum; newborn was hospitalized for acute gastroenteritis at 32 days |
| Beibei Li | 27 | 155 | 81.5 | Obese before pregnancy, less exercise after pregnancy, sweet tooth Fasting blood sugar 5.3mmol/l, 1 hour blood sugar 11.7mmol/l, 2 hour blood sugar 10.5mmol/l. | Buns, nuts, vegetables, fruits, sweets | 3600 | 15 weeks | Vaginitis | Yes (diabetic diet with less pasta and less sugar in divided meals) | Yes, walking and stair climbing upper body exercise | Menthol insulin injection 6u 6u 6u ih before three meals | 5.4 (random) | 38+4 | Cesarean delivery | Male | 3100g | Observation of subpharyngeal syndrome referred to pediatric treatment | The incision liquefied 2*2cm and improved after medication change | 6 days | Postpartum 42 OGTT glucose was normal; no abnormal signs in the newborn |
| Li Jingjing | 28 | 160 | 88 | Less exercise after pregnancy, frequent hunger often add meals Fasting blood glucose 5.3mmol/L, 2020-06-06 2 hours postprandial blood glucose 9.5mmol/L, 2020-06-06 glycated hemoglobin 5.9%. | Steamed buns, rice and soy products, vegetables, fruits, sweets | 3800 | 13 weeks | Vaginitis, excessive amniotic fluid | Yes (diabetic diet with less pasta and less sugar in divided meals) | Yes, climbing stairs on foot | Deferox 14u at bedtime ih, menadione 12u 8u 8u before three meals ih | 6.5 (random) | 39+3 | Cesarean delivery | Male | 3100g | Jaundice referred to pediatric treatment | None, healing can be | 7 days | Postpartum 42 OGTT glucose was normal; no abnormal signs in the newborn |
| Wang Lulu | 29 | 165 | 76 | Obese before pregnancy, less exercise after pregnancy Fasting glucose: 5.9mmol/L, 1 hour postprandial glucose: 13.2mmol/L, 2 hours postprandial glucose: 9.7mmol/L | Steamed buns, rice, vegetables, fruits, nuts | 3300 | 13 weeks | Premature rupture of membranes, vaginitis | Yes (diabetic diet with less pasta and less sugar in divided meals) | Yes, walking upper body movement | Menthol insulin 6u 6u 5u subcutaneous injection before three meals, Dettol insulin 8u at bedtime ih | 6.6 (random) | 38+2 | Cesarean delivery | Male | 3600g | Jaundice improves with oral medication | None, healing can be | 7 days | Postpartum 42 OGTT glucose was normal; no abnormal signs in the newborn |
| Wang Cuijie | 36 | 162 | 67 | More dessert intake after pregnancy OGTT test suggests fasting blood sugar: 4.8 mmol/L, 1 hour postprandial blood sugar: 12 mmol/L, 2 hours postprandial blood sugar: 9.5 mmol/L | Steamed buns, noodles, vegetables, fruits, soy products | 3000 | 15 weeks | Varicose veins of the vulva | Yes (diabetic diet with less pasta, less sugar and less fat) | Yes, climbing stairs on foot | None | Fasting 4.9 | 40+1 | easy childbirth | Female | 3550g | Good | None, healing can be | 3 days | Postpartum 42 OGTT glucose was normal; no abnormal signs in the newborn |
| Changinin | 29 | 165 | 70 | Less exercise, frequent sweet soy juice OGTT6.1-11.7-10.8 mmol/l. HbA1c5.8% | Steamed buns, soy products, vegetables, fruits | 3200 | 3 Months | Hypertensive disorders during pregnancy | Yes (diabetic diet with less pasta and less sugar) | Yes, walking | Menthol insulin 14u 8u 5u subcutaneous injection before three meals, and detergent insulin 15u monitoring blood glucose at bedtime ih | Random 6.7 | 38+1 | Cesarean delivery | Female | 2900g | Diabetic mother's child with  cardiac disorders referred to pediatrics | None, healing can be | 5 days | Postpartum 42 OGTT review, still high after taking sugar, now taking oral metformin and exercise therapy to lower blood sugar; treated in affiliated hospital for heart disease (specific details unknown), requested six months review (not reviewed now), normal growth and development |
| Ji Wuxia | 37 | 155 | 100 | Obese before pregnancy, less exercise after pregnancy Fasting glucose: 4.8 mmol/L, 1 hour postprandial glucose: 10.3 mmol/L, 2 hours postprandial glucose: 10.1 mmol/L, glycated hemoglobin: 5.1%. | Steamed buns, noodles, vegetables, fruits, meat | 3500 | 8 weeks | Hyperlipidemia, low amniotic fluid | Yes (diabetic diet with less pasta, less sugar and low-fat portioned meals) | Yes, walk and climb stairs and ride a bike | Menthol insulin 4u 4u 4u subcutaneous injection before three meals | Fasting 4.6 | 38+3 | Cesarean delivery | Male | 3400g | Neonatal hypoxic-ischemic encephalopathy referred to pediatric care | Fatty nodules 4*2cm improved after infrared physical therapy | 8 days | Postpartum 42 OGTT glucose was normal; no abnormal signs in the newborn |
| Sasha Lee | 36 | 158 | 69 | Pre-pregnancy obesity, after pregnancy often have hunger to eat more fasting blood sugar 6.4mmol/l, 1 hour after meal blood sugar 11.0mmol/l, 2 hours after meal blood sugar 8.8mmol/l. | Steamed buns, noodles, vegetables, fruits, soy products | 2800 | 4 Months |  | Yes (diabetic diet with less pasta and less sugar) | Yes, climbing stairs on foot | Menthol insulin 6u 6u 6u subcutaneous injection before three meals, Dettol insulin 10u at bedtime ih | Random 7.9 | 38 | Cesarean delivery | Female | 3400g | Observation of jaundice referred to pediatric treatment | None, healing can be | 4 days | Postpartum OGTT glucose was normal at 42 postpartum; newborn was hospitalized for acute bronchitis at 20 days |
| Chen Jing | 38 | 160 | 76 | Less exercise after pregnancy Fasting blood glucose 5.6mmol/l, 1 hour postprandial blood glucose 8.9mmol/l, 2 hours postprandial blood glucose 9.1mmol/l | Steamed buns, noodles, vegetables, fruits | 2800 | 16 weeks | Vaginitis | Yes (diabetic diet with less pasta and less sugar in divided meals) | Yes, climbing stairs on foot | Dettol insulin 10u at bedtime ih | Fasting 5.0 | 38+2 | Cesarean delivery | Male | 3600g | Good | None, healing can be | 4 days | The OGTT was reviewed at 42 postpartum and was high 2 hours after taking sugar, now exercise after meals to lower blood sugar; no abnormal signs in the newborn |
| Jie Yanjuan | 36 | 158 | 80 | Pre-pregnancy obesity, post-pregnancy preference for soup-like fluids Fasting glucose: 5.8 mmol/L, 2 hours postprandial glucose: 9.3 mmol/L, glycated hemoglobin: 5.6%, urine routine: ketone bodies +. | Buns, nuts, vegetables, fruits, soups | 3000 | 1 month | Excessive amniotic fluid | Yes (diabetic diet with less pasta and less sugar in divided meals) | Yes, walking and stair climbing upper body exercise | Dettol insulin 11u ih before bedtime Menthol insulin injection 6u 4u ih before brunch | Random 6.4 | 38+5 | easy childbirth | Male | 4600 | Hypoglycemia to Pediatrics | None, healing can be | 4 days | Postpartum 42 OGTT blood glucose is normal; the child is currently obese |
| Liu Qinqin | 30 | 166 | 100 | Obese before pregnancy, less exercise after pregnancy Fasting glucose 5.8 mmol/l, 1h glucose 9.2 mmol/l, glycated hemoglobin 5.9%. | Steamed buns, meat, vegetables, fruits, soy products | 3500 | 3 Months | Varicose veins of the lower extremities and vulva | Yes (diabetic diet with less pasta and less sugar in divided meals) | Yes, bilateral upper limb movement | Dettol insulin 15u at bedtime ih | Fasting 5.1 | Full-term pregnancy | Cesarean delivery | Male | 4500 | Hypoglycemic jaundice referred to pediatric care | None, healing can be | 5 days | Postpartum 42 OGTT glucose was normal; no abnormal signs in the newborn |
| Su Ripple | 29 | 160 | 74 | Prefer fruits and nuts Less exercise Fasting blood glucose: 6.2 mmol/l; 2019-12-07 1h postprandial blood glucose: 11.8 mmol/l; urine routine: glucose-, ketone body+. | Steamed buns, soy products, vegetables, fruits, nuts | 3000 | 3 Months | Hyperlipidemia | Yes (diabetic diet with less pasta and less sugar) | Yes, climbing stairs on foot | Dettol insulin injection 8u iH 10pm; Menthol insulin injection 7u 7u 7u iH 3 meals | Random 4.7 | 39+4 | easy childbirth | Female | 3950 | Neonatal aspiration pneumonia referred to pediatrics | None, healing can be | 4 days | OGTT was rechecked at 42 postpartum and was high 1 hour and 2 hours after taking sugar, now exercising after meals and taking metformin to lower blood sugar; no abnormal signs in the newborn. |
| Xu Shuhua | 27 | 168 | 84 | Pre-pregnancy obesity, preference for juice drinks Fasting glucose 6.3mmol/L; 2 hours postprandial glucose 9.3mmol/L; urine routine urine glucose -, urine ketone bodies ++, bacteria ++. | Steamed buns, vegetables, fruits, and | 2900 | 8 weeks | Urethritis, placenta praevia (complete) | Yes (diabetic diet with less pasta and less sugar) | Yes, double upper body exercise, bicycle exercise | Dettol insulin injection 14u iH 10pm; Menthol insulin injection 4u 4u iH before breakfast and lunch | Random 5.4 | 38+4 | Cesarean delivery | Male | 3300g | Neonatal hypopharyngeal syndrome Neonatal aspiration pneumonia referred to pediatrics | None, healing can be | 7 days | Postpartum 42 OGTT glucose was normal; no abnormal signs in the newborn |
| Wang Yang | 27 | 160 | 67.5 | Sweet fruits and sweets eaten more Fasting blood sugar: 5.1mmol/L, 1 hour postprandial blood sugar: 11.9mmol/L, 2 hours postprandial blood sugar: 6.2mmol/L, urine routine: ketone body +. | Steamed buns, noodles, vegetables, fruits, sweets | 2400 | 2 Months | Low amniotic fluid and hypothyroxinemia | Yes (diabetic diet with less pasta and less sugar in divided meals) | Yes, climbing stairs on foot | None | Random 4.9 | 37+4 | Cesarean delivery | Male | 3350 | Good | None, healing can be | 5 days | Postpartum 42 OGTT glucose was normal; no abnormal signs in the newborn |
| He Yu Yu | 33 | 158 | 64.5 | Frequent hunger pangs, frequent extra meals OGTT test:fasting blood glucose 5.1mmol/L, 1 hour blood glucose 11.7mmol/L, 2 hour blood glucose 9.6mmol/L; 2019-11-22 urine routine:glucose -, ketone bodies -, bacteria 2+. | Steamed buns, noodles, vegetables, fruits | 3000 | 14 weeks | Vaginitis | Yes (diabetic diet with less pasta and less sugar) | Yes, walking | Dettol insulin injection 8u iH 10pm | Random 6.2 | 39+2 | easy childbirth | Male | 3750 | Jaundice improves with oral medication | None, healing can be | 8 days | Postpartum 42 OGTT glucose was normal; no abnormal signs in the newborn |
| Yang Han | 26 | 168 | 90 | Obese before pregnancy, frequent pasta and fruit after pregnancy Fasting blood glucose: 6.1 mmol/L; glycosylated hemoglobin: 7.5%. | Steamed buns, noodles, vegetables, fruits | 3600 | 2 weeks | None | Yes (diabetic diet with less pasta, less sugar and less fat) | Yes, walk and climb stairs and ride a bike | Dettol insulin injection 10u iH 10pm; Menthol insulin injection 8u 8u 8u iH before meal | Random 6.7 | 38+3 | Cesarean delivery | Female | 4500 | Observation of hypoglycemia referred to pediatric treatment | The incision liquefied 4*2cm and improved after medication change | 5 days | Postpartum 42 OGTT glucose was normal; no abnormal signs in the newborn |
| Shi Xirong | 30 | 174 | 74 | Less exercise 2019-11-12 Fasting blood glucose: 5.7 mmol/L; 1 hour postprandial blood glucose: 9.7 mmol/L; 2 hours postprandial blood glucose: 8.1 mmol/L. | Buns, nuts, vegetables, fruits, and | 2700 | 13 weeks | Intrauterine distress of the fetus | Yes (diabetic diet with less pasta and less sugar in divided meals) | Yes, walking | None | Random 5.8 | 39+4 | easy childbirth | Female | 3600 | Observation of ischemic-hypoxic encephalopathy transferred to pediatric treatment | None, healing can be | 3 days | Postpartum 42 OGTT glucose was normal; no abnormal signs in the newborn |
| Li Stop | 29 | 158 | 82 | Pre-pregnancy obesity Fasting glucose 5.3 mmol/L. 1 h postprandial glucose 9 mmol/L. 2 h postprandial glucose 8 mmol/L. Urine routine shows urine glucose +, ketone bodies +, and | Steamed buns, noodles, vegetables, fruits, nuts | 3500 | 5 weeks | Hyperlipidemia, hypertensive disorders during pregnancy | Yes (diabetic diet with less pasta and less sugar in divided meals) | Yes, walking upper body exercise climbing stairs | None | Random 5.0 | 39+1 | Cesarean delivery | Female | 3400 | Jaundice improves with oral medication | None, healing can be | 7 days | Postpartum 42 OGTT glucose was normal; no abnormal signs in the newborn |
| Xue Jinjin | 32 | 165 | 90 | Obese before pregnancy, less exercise after pregnancy, preference for meat OGTT test: fasting blood glucose 6.0 mmol/L, 1-hour blood glucose 12.5 mmol/L, 2-hour blood glucose 8.4 mmol/L | Steamed buns, soy products, vegetables, fruits, meat | 2700 | 3 Months | Intrauterine distress of the fetus | Yes (diabetic diet with less pasta and less sugar in divided meals) | Yes, walking | Dettol insulin injection 7u iH 10pm; Menthol insulin injection 5u 5u 5u iH before meal | Random 8.1 | 38+6 | Cesarean delivery | Female | 4300 | Hypoglycemia, aspiration pneumonia referred to pediatrics | None, healing can be | 7 days | Postpartum 42 OGTT glucose was normal; the child is currently obese. |
| Yang Haiding | 32 | 174 | 94 | Pre-pregnancy obesity, frequent hunger after pregnancy, frequent extra meals Fasting blood glucose 5.4mmol/L2019-10-10 2h postprandial blood glucose 10mmol/L | Steamed buns, soy products, vegetables, fruits, nuts | 3800 | More than 10 days | Excessive amniotic fluid | Yes (diabetic diet with less pasta and less sugar) | Yes, climbing stairs on foot | Menthol insulin injection 4u 4u 4u iH before meal | Random 5.6 | 38+4 | Cesarean delivery | Female | 4300 | Observation of jaundice referred to pediatric treatment | None, healing can be | 4 days | Postpartum 42 OGTT glucose was normal; no abnormal signs in the newborn |
| Xu Yuyao | 39 | 166 | 88 | Pre-pregnancy obesity Fasting glucose 6.6mmol/l, 1h glucose 14.1mmol/l, 2h glucose 8.7mmol/l. | Steamed buns, soy products, vegetables, fruits | 3500 | 13 weeks | None | Yes (diabetic diet with less pasta and less sugar in divided meals) | Yes, walk and climb stairs and ride a bike | Dettol insulin injection 16u iH Blood glucose monitoring at 10 pm | Random 4.8 | 39+3 | Cesarean delivery | Male | 4200 | Observation of neonatal ischemic-hypoxic encephalopathy transferred to pediatrics | The incision liquefies 3*3cm and heals after a change of medication. | 8 days | Postpartum 42 OGTT glucose was normal; no abnormal signs in the newborn |
| Shan Chunli | 42 | 168 | 78 | Less exercise after pregnancy 2019-09-04 Fasting glucose 6.7mmol/L, 2 hours postprandial glucose 11.0mmol/L | Steamed buns, soy products, vegetables, fruits | 3300 | More than 3 months | Idiopathic rash during pregnancy | Yes (diabetic diet with less pasta and less sugar in divided meals) | Yes, walk and climb stairs and ride a bike | Dettol insulin injection 10u iH 10pm | Fasting 5.1 | 38+5 | Cesarean delivery | Male | 3300 | Good | None, healing can be | 7 days | Postpartum 42 OGTT glucose was normal; no abnormal signs in the newborn |
| Zhang Peipei | 31 | 168 | 77 | Prefer to drink juice drinks Fasting blood sugar 6.1mmol/l, 1 hour after taking sugar 12.1mmol/l, 2 hours after taking sugar 10.5mmol/l. | Buns, juices, vegetables, nuts | 3200 | 13 weeks | Vulvar varicose veins, vaginitis | Yes (diabetic diet with less pasta and less sugar in divided meals) | Yes, walking | Menthol insulin injection 6u 5u 6u ih before three meals | Random 4.7 | 38+2 | Cesarean delivery | Female | 3000 | Good | None, healing can be | 8 days | Postpartum 42 OGTT glucose was normal; no abnormal signs in the newborn |
| Liu Wei | 36 | 164 | 74 | Likes to eat nutty foods 2019-5-16 Fasting blood glucose: 5.7mmol/L, 1 hour postprandial blood glucose: 12.2mmol/L, 2 hours postprandial blood glucose: 10.5mmol/L, urine routine: urine ketone body +, bacteria 2+. | Buns, vegetables, fruits, nuts | 3000 | More than 3 months | Urethritis, excess amniotic fluid | Yes (diabetic diet with less pasta and less sugar) | Yes, walking | Dettol insulin 22U per night | Fasting 4.2 | 39+3 | Cesarean delivery | Female | 3900 | Jaundice improves with oral medication | None, healing can be | 6 days | The OGTT was reviewed 42 days after delivery and was high 1 hour after taking sugar, now exercise after meals to lower blood sugar; no abnormal signs in the newborn |
| Li Jiawei | 30 | 160 | 71 | Less exercise OGTT test: fasting glucose 5.2mmol/l, 1h glucose 10.3mmol/l, 2h glucose 7.3mmol/l. | Steamed buns, soy products, vegetables, fruits | 2600 | 14 weeks | None | Yes (diabetic diet with less pasta and less sugar) | Yes, walking | None | Fasting 5.0 | 40+2 | easy childbirth | Female | 3300 | Jaundice improves with oral medication | None, healing can be | 3 days | Postpartum 42 OGTT glucose was normal; no abnormal signs in the newborn |
| Han Xiaoxiao | 24 | 164 | 93 | Pre-pregnancy obesity, meat-based diet Fasting blood sugar: 6.6mmol/L, 1 hour postprandial blood sugar: 13.1mmol/L, 2 hours postprandial blood sugar: 9.8mmol/L. | Steamed buns, meat, vegetables, fruits | 3500 | March | Premature rupture of fetal membranes | Yes (diabetic diet with less pasta, less sugar and low-fat portioned meals) | Yes, climbing stairs on foot | Dietary insulin injection 6H 10pm; Menthol insulin injection 5u 5 u ih before breakfast and lunch | Random 6.8 | 38+3 | Cesarean delivery | Female | 4400 | Aspiration pneumonia, ischemic-hypoxic encephalopathy transferred to pediatric treatment observation | None, healing can be | 6 days | Postpartum OGTT glucose was normal at 42 postpartum; newborn was hospitalized for bronchopneumonia sepsis at 22 days |
| Liu Fangfang | 31 | 161 | 95 | Pre-pregnancy obesity 2019-03-07 fasting glucose 6.7mmol/L; 1 hour postprandial glucose 9.4mmol/L; 2 hour postprandial glucose 4.4mmol/L; glycated hemoglobin 5.7%; urinary routine urine glucose -, ketone bodies ++, white blood cells ++, bacteria ++. | Buns, vegetables, fruits, nuts | 3000 | February | Urethritis, excess amniotic fluid | Yes (diabetic diet with less pasta and less sugar in divided meals) | Yes, walk and climb stairs and ride a bike | Dettol insulin injection 6H 7am | Fasting 6.2 | 39+1 | Cesarean delivery | Male | 3900 | Good | None, healing can be | 8 days | The OGTT was reviewed at 42 postpartum and was high 2 hours after taking sugar, now exercise after meals to lower blood sugar; no abnormal signs in the newborn |
| Chu Hongting | 23 | 165 | 89 | Pre-pregnancy obesity, preference for desserts, fasting blood sugar 5.7mmol/L | Steamed buns, rice, vegetables, fruits, sweets | 2600 | February | None | Yes (diabetic diet with less pasta and less sugar) | Yes, climbing stairs biking walking | None | Fasting 5.3 | 41 | Cesarean delivery | Female | 4500 | Hypoglycemia to Pediatrics | Ligation of the superior branch of the uterine artery bilaterally for postpartum hemorrhage due to uterine contraction weakness | 7 days | Postpartum 42 OGTT blood glucose normal, anemia treated with iron; child currently obese (height 91, weight 34 pounds) |
| Li Tingting | 31 | 161 | 73 | After pregnancy, she ate more meat and soy products and fruits, and her fasting blood sugar was 6.5 mmol/L. | Steamed buns, noodles, vegetables, fruits, soy products | 3000 | January | Vaginitis, varicose veins of the vulva | Yes (diabetic diet with less pasta and less sugar in divided meals) | Yes, upper body exercise cycling | Dettol insulin injection 6H 10pm | Random 5.3 | 38+2 | Cesarean section (twin births) | Male / Female | 2500/2300 | Hypoglycemia to Pediatrics | None, healing can be | 17 days | Postpartum 42 OGTT glucose was normal; no abnormal signs in the newborn |
| Huang Guihua | 29 | 163 | 71 | Low exercise after pregnancy Fasting glucose 5.0mmol/L, 1h postprandial glucose 10.4mmol/l. | Steamed buns, noodles, vegetables, fruits | 2600 | More than 1 month | None | Yes (diabetic diet with less pasta, less sugar and low-fat portioned meals) | Yes, walking and biking | Dettol insulin 4u ih before breakfast qd | Random 4.5 | 39+3 | easy childbirth | Female | 3400 | Good | None, healing can be | 3 days | Postpartum 42 OGTT glucose was normal; no abnormal signs in the newborn |
| Tian Man Man | 29 | 171 | 95 | Pre-pregnancy obesity, preference for pasta and fruits Fasting blood sugar 8.0mmol/L | Steamed buns, rice, noodles vegetables, fruits, sweets | 3600 | 2 Months | Hyperlipidemia vaginitis amniotic fluid overload | Yes (diabetic diet with less pasta and less sugar in divided meals and low fat) | Yes, climbing stairs on foot | Menthol insulin 6u 12u 7u before three meals, Dettol insulin 16u 10pm | Fasting 6.2 | 37+6 | Cesarean delivery | Male | 3600 | Aspiration pneumonia, ischemic-hypoxic encephalopathy transferred to pediatric treatment observation | None, healing can be | 8 days | Postpartum 42 OGTT blood glucose normal; child is fat (height 93, weight 35 pounds) prone to allergies and cough |
